# Supplementary material for: Hydrolysable core crosslinked particles for receptor-mediated pH-sensitive anticancer drug delivery
Source: Royal Society of Chemistry journal article supplement (doi:10.1039/c5nj01404b), 2015-01-01
Supplement: c5nj01404b1.pdf [file c5nj01404b1.pdf]

# Supporting Information

## Hydrolysable core crosslinked particle for receptor-mediated pH-sensitive anticancer drug delivery

Xifeng Liu,<sup>ab</sup> A. Lee Miller II,<sup>ab</sup> Brian E. Waletzki,<sup>ab</sup> Tewodros K. Mamo<sup>a</sup>,  
J. Yaszemski,<sup>ab</sup> and Lichun Lu<sup>\*ab</sup>

<sup>a</sup>Department of Orthopedic Surgery, Mayo Clinic, Rochester, MN 55905, USA.

<sup>b</sup>Department of Physiology and Biomedical Engineering, Mayo Clinic, Rochester, MN 55905, USA

\*Email: Lu.Lichun@mayo.edu

### Results

**Table S1** Polymer properties including number average molecular weight ( $M_n$ ), weight average molecular weight ( $M_w$ ), polydispersity index (PDI), glass transition temperature ( $T_g$ ) and degradation temperature ( $T_d$ ) for copolymers.

| Polymers        | $M_n$<br>(g mol <sup>-1</sup> ) | $M_w$<br>(g mol <sup>-1</sup> ) | PDI | $T_g$<br>(°C) | $T_d$<br>(°C) |
|-----------------|---------------------------------|---------------------------------|-----|---------------|---------------|
| PPF             | 4400                            | 10900                           | 2.4 | 9.7           | 390.2         |
| PPF-PLGA        | 13200                           | 37400                           | 2.8 | 38.8          | 275.8         |
| PPF-PLGA-PEG    | 14400                           | 32700                           | 2.3 | 27.5          | 358.5         |
| PPF-PLGA-PEG-FA | 14900                           | 33000                           | 2.2 | 33.8          | 359.0         |

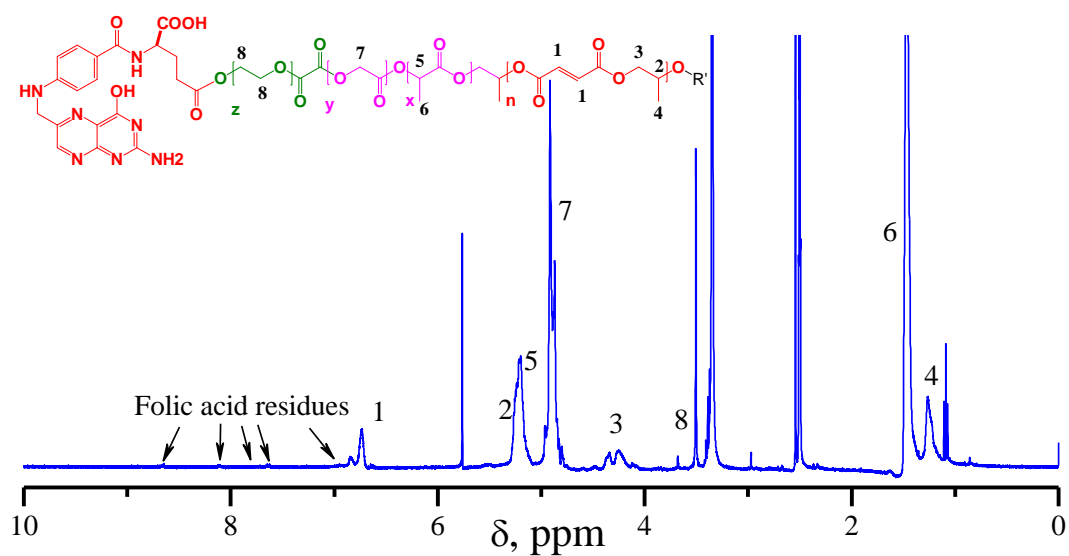

**Fig. S1** The <sup>1</sup>H NMR spectrum of synthesized PPF-PLGA-PEG-FA copolymer in DMSO-*d*<sub>6</sub> solvents.

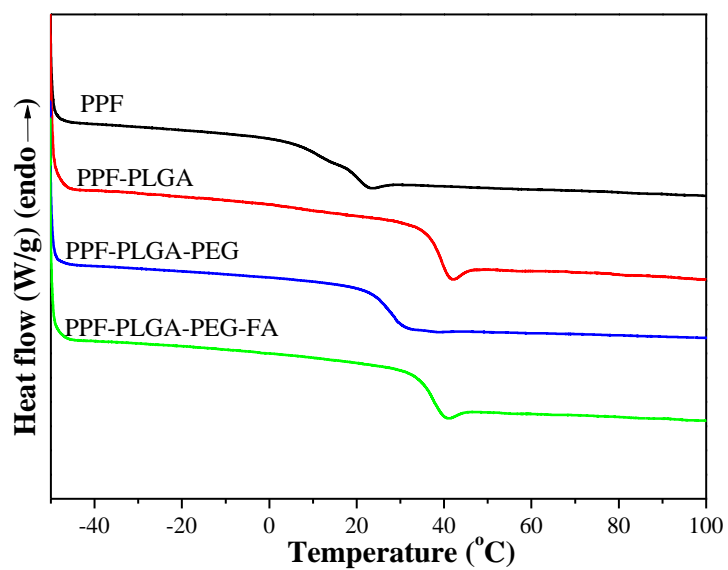

**Fig. S2** DSC curves of copolymer chains determined at a heating rate of 5 °C min<sup>-1</sup>.

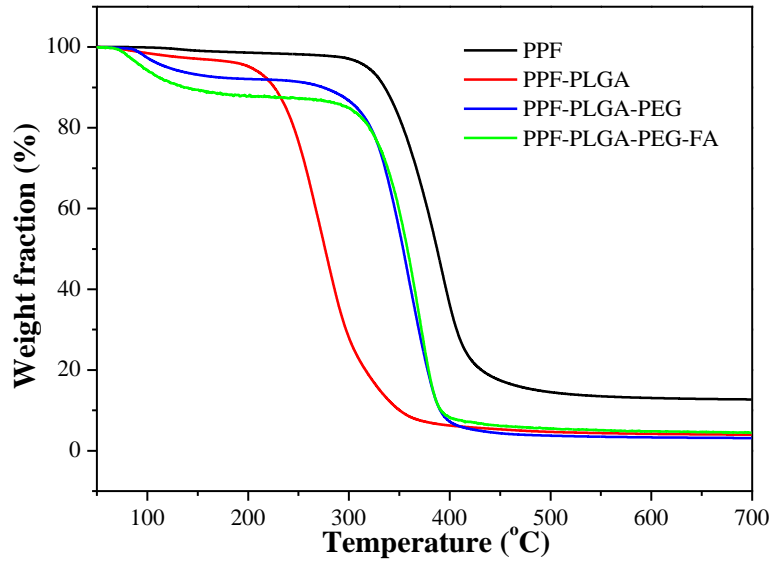

**Fig. S3** TGA curves of copolymer chains determined from room temperature to 700 °C at a heating rate of 20 °C min<sup>-1</sup>.

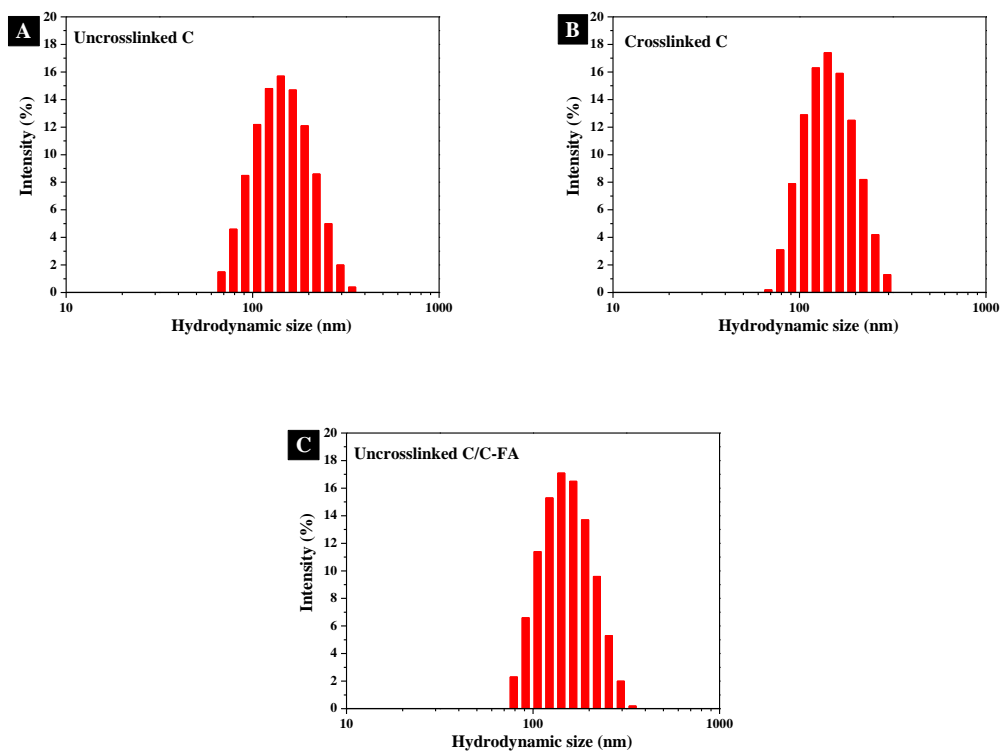

**Fig. S4** Hydrodynamic size distributions of uncrosslinked C, crosslinked C, and uncrosslinked C/C-FA micelles.

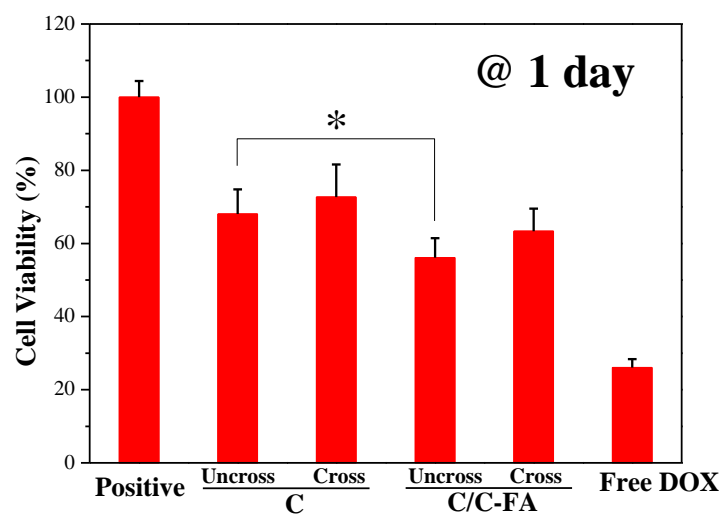

**Fig. S5** HeLa cancer cell viabilities quantified at 1 days culture with DOX loaded micelles or free DOX at a concentration of  $5 \mu\text{g mL}^{-1}$ . \*  $p < 0.05$  analyzed by One-Way ANOVA test.

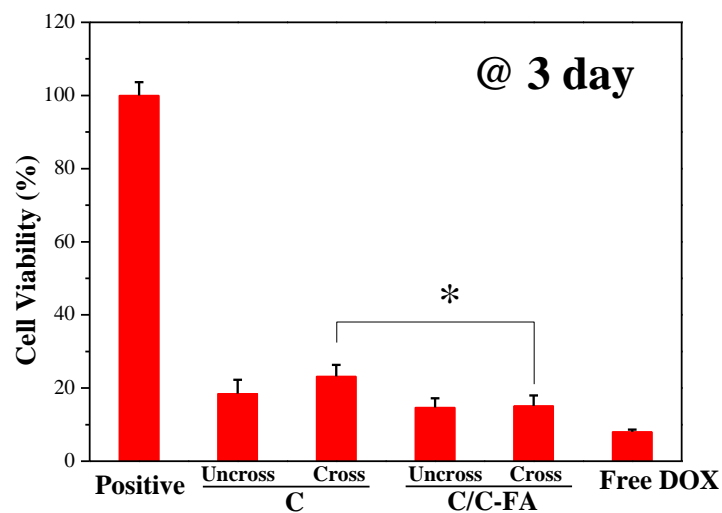

**Fig. S6** HeLa cancer cell viabilities quantified at 3 days culture with DOX loaded micelles or free DOX at a concentration of  $5 \mu\text{g mL}^{-1}$  DOX. This test is to confirm the trend determined in cell viability under varied DOX concentrations ( $0.01\text{--}50 \mu\text{g mL}^{-1}$ ) and to substantiate the cell number changes observed by fluorescent microscope. \*  $p < 0.05$ .
